# Supplementary material
Source: PubMed Central journal article supplement (PMC3910354)
Supplement: 97320630009996S1.pdf [file 97320630009996S1.pdf]

## Supplementary material:

**Table 1:** Transcriptional regulatory and other signalling molecule categories identified within AUX-IAA target genes.

| Name                  | Total Entities | Overlap | Percent Overlap | Overlapping Entities                                                                                                                                                                                                                                                                                                                                                                                                                                                                                                                                                                                                                                                                                                                                                                                                                                                                                                                 | p-value  | Data Source     |
|-----------------------|----------------|---------|-----------------|--------------------------------------------------------------------------------------------------------------------------------------------------------------------------------------------------------------------------------------------------------------------------------------------------------------------------------------------------------------------------------------------------------------------------------------------------------------------------------------------------------------------------------------------------------------------------------------------------------------------------------------------------------------------------------------------------------------------------------------------------------------------------------------------------------------------------------------------------------------------------------------------------------------------------------------|----------|-----------------|
| Transcription factors | 3168           | 136     | 4               | BLH7,F6F22.16,T30L20.2,T3B23.13,T9I4.14,T20F21.22,F16M14.2,T3K9.10,F17K2.21,F5E6.8,ANAC050,ZML1,AT3G24120,AT3G24490,ATTCP20,AT3G46070,MNP,UNE16,UNE12,LOL2,AT4G23800,F26P21.10,F19H22.5,ATRL1,SHN3,T15N1.10,MYB16,F6A4.140,MWD22.13,MSG15.9,SCL8,F6N7.15,F24B18.9,ILR3,OBP4,MRG21.2,K1L20.10,T21E18.12,T12M4.4,F12F1.18,F16F4.11,F12K8.16,ATHB54,T1P2.2,F15O4.35,HSFB4,T15M6.12,F16M19.21,F2K11.14,T6L1.1,SPL6,TRFL6,ATHB33,ATRL6,F10A5.10,F7O12.5,TLP1,EGL3,CDC5,ANT,EIN3,ATHB8,AHK3,WOL,RAP2.3,GL2,FIE,ATML1,RGA1,BIM2,IAA13,ICE1,EIN4,BLH1,WRKY3,SPL3,WRKY75,KNAT7,PRR7,RAV1,EPR1,EMF2,HMGB1,RAP2.4,HSF4,IAA14,SCR,MYB61,ARF19,WLIM1,GL3,TOPII,SPL2,SPL7,BZIP60,BZIP34,SIG2,WER,TT2,RAP2.12,AUX2-11,OBP1,ATNAC2,ANAC012,ATHB6,WRKY17,GBF6,ATHB13,SPL5,RAP2.7,ANL2,MYB73,MYB106,SCL3,TFIIS,AHBP1B,SPL9,Os05g0121400,IAA9,CRF2,SPL10,PAT1,NFYC1,SPL14,RAP2.2,MYB113,MYB3,TLP2,TLP7,SPL1,WRKY41,HSFB2A,TLPI0,F13K9.15,APRR2,BHLH1093 | 0.038674 | Protein classes |
| Phosphatases          | 431            | 22      | 5               | PAP10,F13D4.1,T20F21.13,F4P13.6,ATPEN2,PAP18,TOPP7,DL4315C,F11C18.60,F20M13.80,PLL2,PPX2,MIK19.6,T7A14.14,F14I3.5,TOPP3,F25P22.24,WOL,ABI2,IBR5,CPL3,WIN2                                                                                                                                                                                                                                                                                                                                                                                                                                                                                                                                                                                                                                                                                                                                                                            | 0.001    | Protein classes |
| Receptors             | 202            | 11      | 5               | F22I13.120,MVA3.30,CLV1,PHYB,AHK3,CRY1,WOL,ACR4,GCR1,PLPB,TMK1                                                                                                                                                                                                                                                                                                                                                                                                                                                                                                                                                                                                                                                                                                                                                                                                                                                                       | 0.015084 | Protein classes |
| Protein kinases       | 3483           | 119     | 3               | F27O10.5,F16F14.25,T20K24.15,ALE2,F27D4.14,F18A8.10,APK1B,T21L14.21,F1O11.20,T7M7.19,CYCP3;1,ATNEK2,WNK1,ATSIK,T16O11.3,AT3G15220,AT3G15890,F4P13.4,AT3G22750,CKL10,AT3G24190,AT3G26700,AT3G44610,CKA2,AT3G53380,AT3G54030,AT3G56370,AT3G57120,CYCP3;2,CYCP1;1,DL3215C,DL4210W,T18B16.80,F17I23.140,F10M6.110,T4L20.80,M4E13.90,F20M13.30,MYH9.10,T31P16.10,CPK7,MUA22.21,T9L3.20,T28N17.1,ATNEK3,YAK1,MMG4.2,MRA19.22,D6PKL2,K17N15.11,MRB17.9,MDA7.8,AT5G57670,MCK7.17,K19M22.7,F14L17.16,F19K19.4,T7N9.25,FU,F8L10.9,MAP3KA,ATSK42,F2K11.19,T2E12.5,CKL2,T9L24.35,AT1G10850,CYCD3;3,OST1,CLV1,MAPKKK5,PID,CYCH;1,PHYB,AHK3,WEE1,CRY1,WOL,FER,BIN2,BRI1,ERS1,F20M17.8,ACR4,ARSK1,EIN4,IBR5,MPK7,NEK6,MPK18,CYCA3;2,CK1,AKIN10,IBS1,SERK2,BAM1,CIPK3,CPK21,CIPK23,CKB4,GRIK2,THE1,MKK3,CDKE;1,BAM3,CDKB1;2,S6K2,PBS1,SIP3,SIP4,RKL1,SRF7,AT3G14840,CPK8,F18E5.30,TMK1,K19P17.5,CPK13,AT3G59350                                      | 0.029651 | Protein classes |
